# Supplementary material for: A Mott transistor with giant switching ratio at room temperature and its emulation of artificial synapses
Source: Royal Society of Chemistry journal article supplement (doi:10.1039/d2tc01592g), 2022-01-01
Supplement: d2tc01592g1.pdf [file d2tc01592g1.pdf]

## Supporting Information

### **Mott transistor with giant switching ratio at room temperature and its emulation of artificial synapses**

You-Shan Zhang,<sup>‡a</sup> Bin-Jie Chen,<sup>‡a</sup> Xing Deng,<sup>a</sup> Zhao Guan,<sup>a</sup> Bin-Bin Chen,<sup>a</sup> Ye  
Chen,<sup>a</sup> Ni Zhong<sup>\*ab</sup>, Ping-Hua Xiang<sup>\*ab</sup>, and Chun-Gang Duan<sup>ab</sup>

<sup>a</sup>Key Laboratory of Polar Materials and Devices (MOE), Department of Electronics,  
East China Normal University, Shanghai 200241, P.R. China.

E-mail: nzhong@ee.ecnu.edu.cn, phxiang@ee.ecnu.edu.cn

<sup>b</sup>Collaborative Innovation Center of Extreme Optics, Shanxi University, Taiyuan  
030006, P.R. China

<sup>‡</sup> These authors contributed equally.

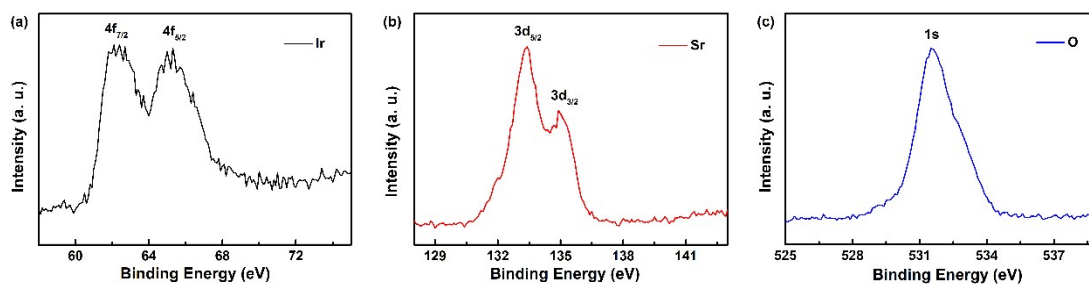

**Figure S1.** The XPS spectra of  $\text{Sr}_2\text{IrO}_4$  films. (a) Ir 4f peaks; (b) Sr 3d peaks; (c) O 1s peaks. The binding energy of all valence elements are consistent with those reported previously.<sup>1,2</sup>

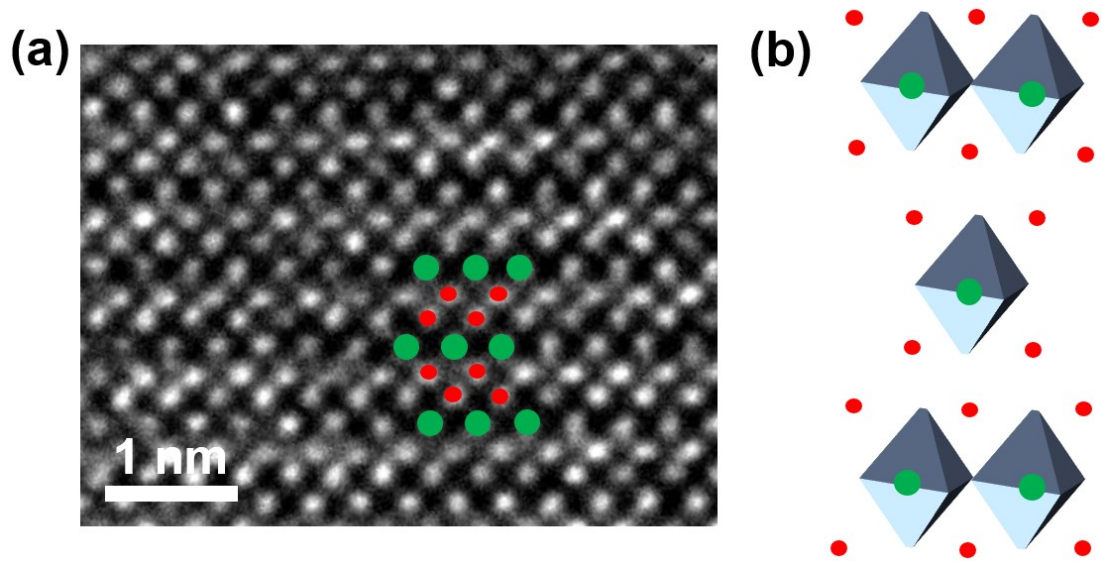

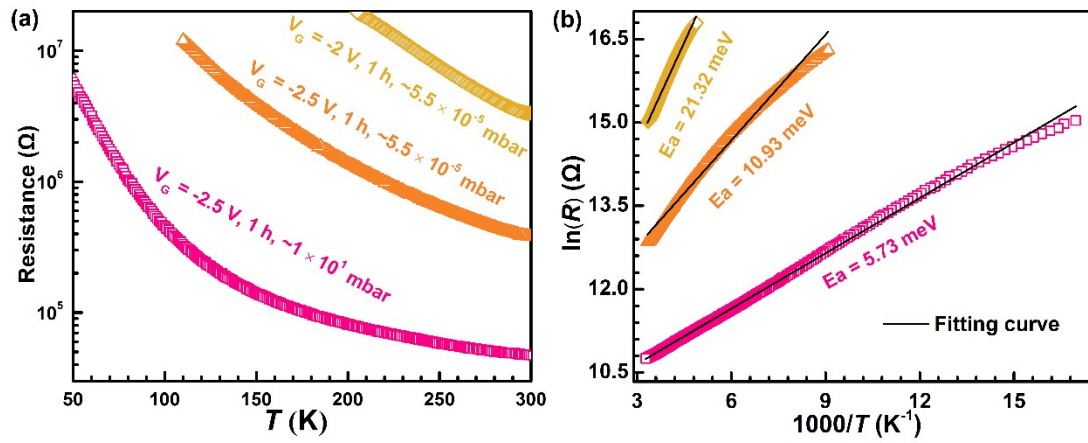

**Figure S3.** (a) Temperature ( $T$ ) dependence of resistance ( $R$ ) of the  $\text{Sr}_2\text{IrO}_4$  channel under the different gate voltage and vacuum conditions. (b)  $\ln(R)$  as a function of  $1/T$  according to the thermal activation model. With the increase of gating bias ( $V_G$ ) and the decrease of vacuum, both the values of  $R$  and activation energy ( $E_a$ ) of the  $\text{Sr}_2\text{IrO}_4$  channel decrease, indicating that the metallicity tends to increase.<sup>3</sup>

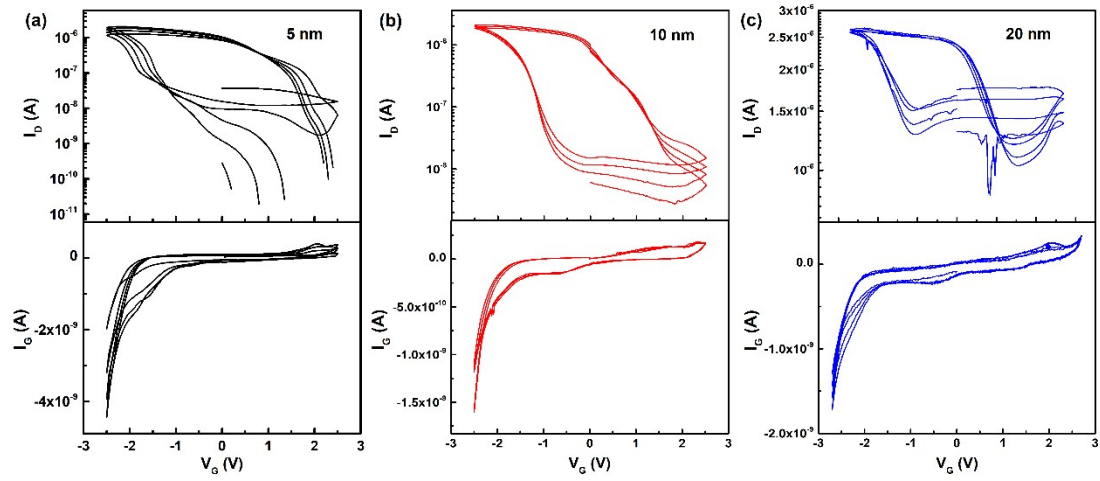

**Figure S4.** Transfer characteristics ( $I_D$ - $V_G$  and  $I_G$ - $V_G$  curves) of SIO-EDLTs with various channel thickness measured under 10 mbar. The thickness of channel  $\text{Sr}_2\text{IrO}_4$  film is (a) 5 nm, (b) 10 nm and (c) 20 nm, respectively.

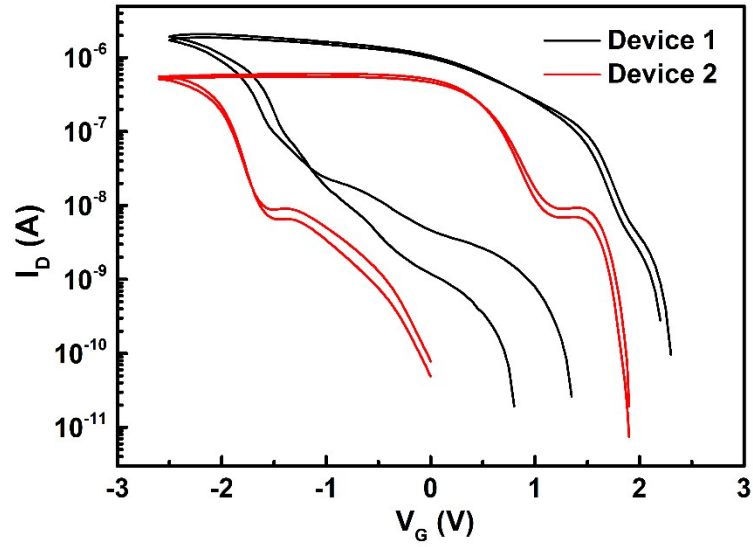

**Figure S5.** Transfer curves ( $I_D$ - $V_G$ ) of various SIO-EDLTs with  $\sim 5$ nm-thick SIO films measured under 10 mbar. The transfer characteristics of the SIO-EDLTs are sensitive to thickness of SIO channel layer. The observed difference between these two devices probably originates from small thickness difference of their SIO channel because a relatively large error is generally present when estimating the thickness of ultrathin films from XRD patterns.

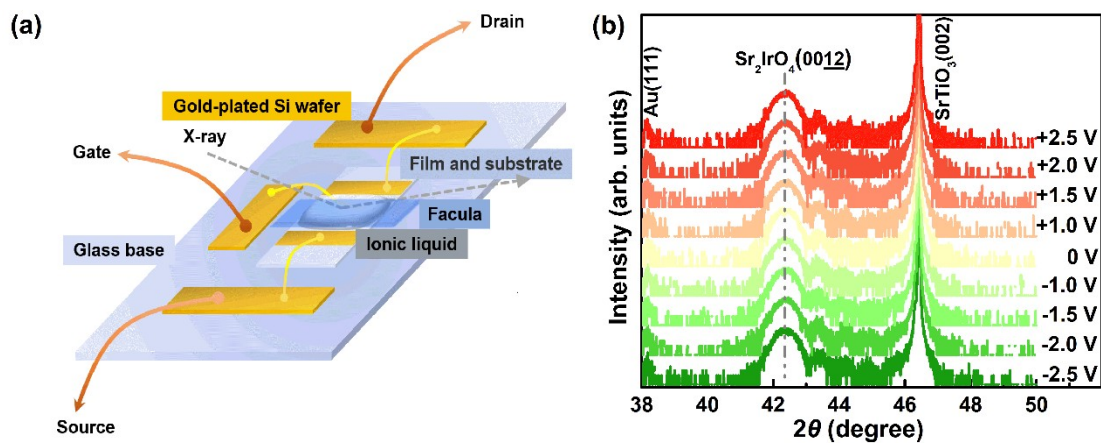

**Figure S6.** (a) Schematics of in situ XRD test device. (b) In situ XRD tests of  $\text{Sr}_2\text{IrO}_4$  films at different gate voltages. Applying different gate voltages, the position, intensity and half-height width of the  $\text{Sr}_2\text{IrO}_4$  film peak ( $00\bar{1}2$ ) did not show any significant change.

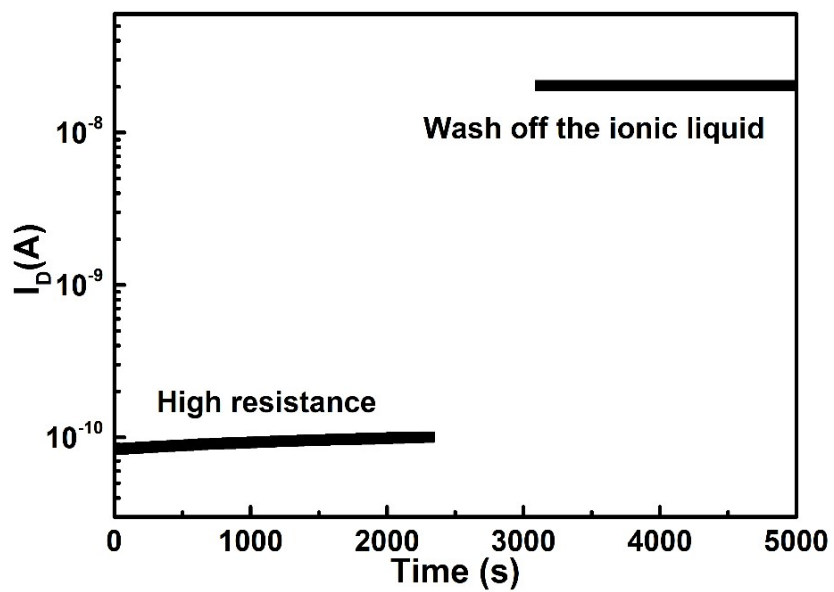

**Figure S7.** Channel current changes before and after ionic liquid exists. In the case of high resistance, the resistance decreases rapidly when the ionic liquid is washed off.



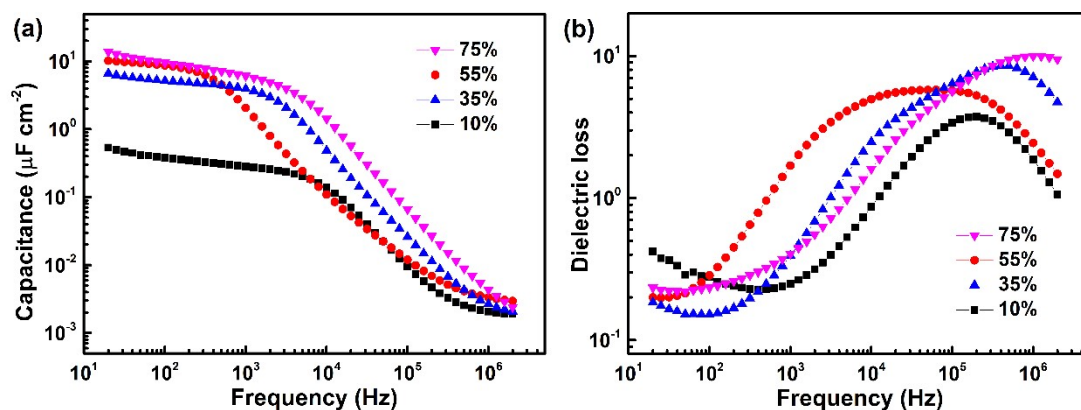

**Figure S8.** The capacitance (a) and loss (b) of ionic liquid vary with frequency at different humidity (10%, 35%, 55% and 75%). Different saturated salt solutions were selected to achieve humidity control. The saturated salt solutions of potassium hydroxide, magnesium chloride, magnesium nitrate and sodium chloride were respectively placed in a closed test chamber with a hygrometer to achieve humidity states of 10%, 35%, 55% and 75% at room temperature.<sup>4</sup> Each humidity level was kept at room temperature for 12 hours prior to each test.

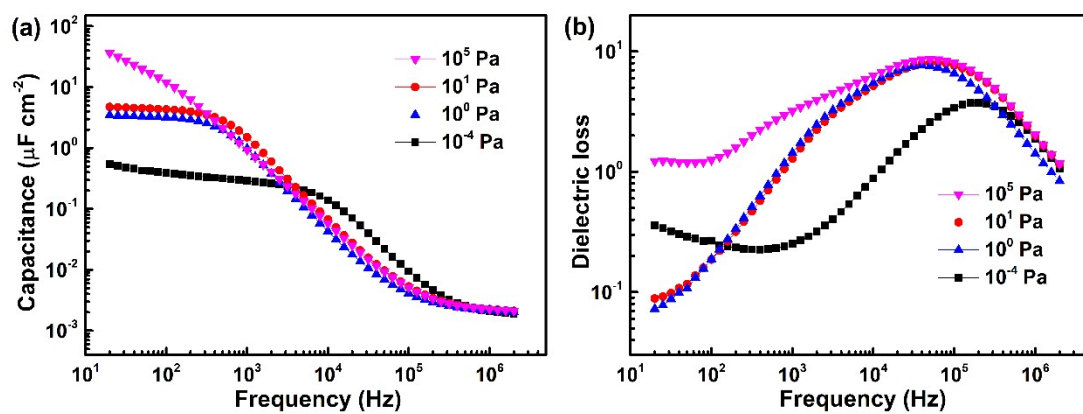

**Figure S9.** The capacitance (a) and loss (b) of ionic liquid vary with frequency at different vacuum degrees ( $10^{-4}$ ,  $10^0$ ,  $10^1$  and  $10^5$  Pa).

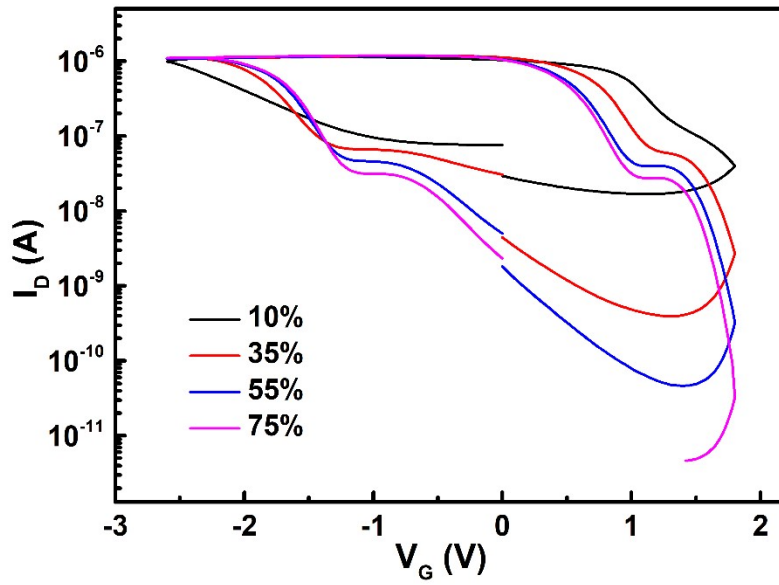

**Figure S10.** Transfer characteristics ( $I_D$ - $V_G$  curves) of  $\sim 5$ nm-thick SIO-EDLT under various humidity. The relative humidity increases from 10% to 75% and each relative humidity level needs to be stabilized for 12 hours in the chamber before the electrical measurement.

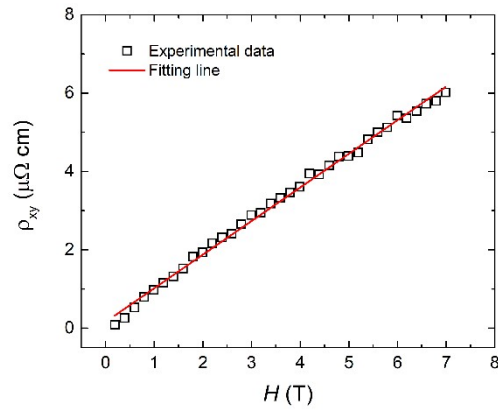

**Figure S11.** Magnetic field dependence of Hall resistivity  $\rho_{xy}$  at 300K of the SIO film with thickness of  $\sim 30$  nm. The positive Hall coefficient indicates that the pristine SIO thin film is p-type conduction, which is consistent with typical p-channel field-effect-transistor operation of SIO-EDLT. A previous study<sup>5</sup> also reported p-type conduction in bulk SIO.

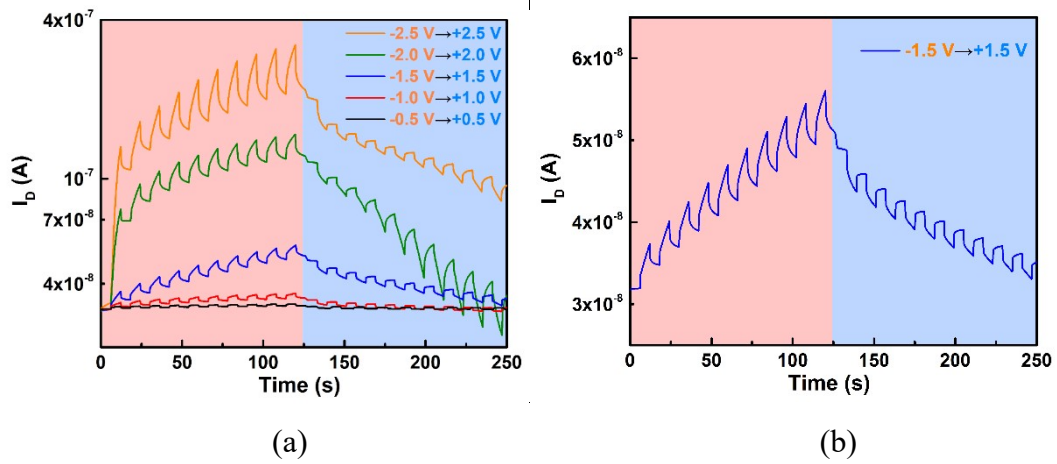

**Figure S12.** (a) The response of  $I_D$  triggered by a train of consecutive pulses with different pulse voltage. (b)  $I_D$  response with consecutive pulses of  $-1.5 \text{ V}$  and  $+1.5 \text{ V}$  in linear coordinate. The orange area on the left is different negative voltage pulses, and the corresponding positive voltage pulses are on the right.

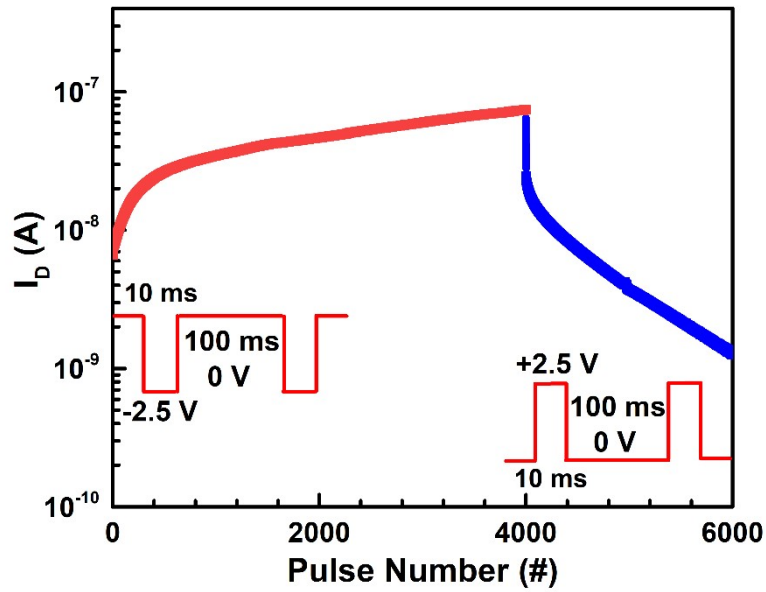

**Figure S13.** Simulation of synaptic potentiation and depression of SIO-EDLTs at short pulse width (10 ms).

#### References

- 1 M. J. Bozack. *Surf. Sci. Spectra*, 1993, **2**, 123-127.
- 2 M. Li, H. Liu, H. Zhu, H. Gao, S. Zhang and T. Chen. *J. Mol. Liq.*, 2017, **233**, 364-369.
- 3 P. H. Xiang, H. Yamada, A. Sawa and H. Akoh, *J. Appl. Phys.*, 2010, **107**, 063717.
- 4 L. Greenspan. *J. Res. Natl. Bur. Stand. A. Phys. Chem.*, 1977, **81A**, 89-96.
- 5 Y. Klein and I. Terasaki, *J. Phys.: Condens. Matter*, 2008, **20**, 295201.
